# Supplementary material
Source: PubMed Central journal article supplement (PMC2668003)
Supplement: mmc1.pdf [file mmc1.pdf]

## Supplemental Data

## Mutations in *SPINT2* Cause a Syndromic Form of Congenital Sodium Diarrhea

Peter Heinz-Erian, Thomas Müller, Birgit Krabichler, Melanie Schranz, Christian Becker, Franz Rüschen-dorf, Peter Nürnberg, Bernard Rossier, Mihailo Vujic, Ian W. Booth, Christer Holmberg, Cisca Wijmenga, Giedre Grigelioniene, C. M. Frank Kneepkens, Stefan Rosipal, Martin Mistrik, Matthias Kappler, Laurent Michaud, Ludwig-Christoph Dóczy, Victoria Mok Siu, Marie Krantz, Heinz Zoller, Gerd Utermann, and Andreas R. Janecke

**Figure S1.** Detection of *SPINT2* Mutations in Syndromic CSD

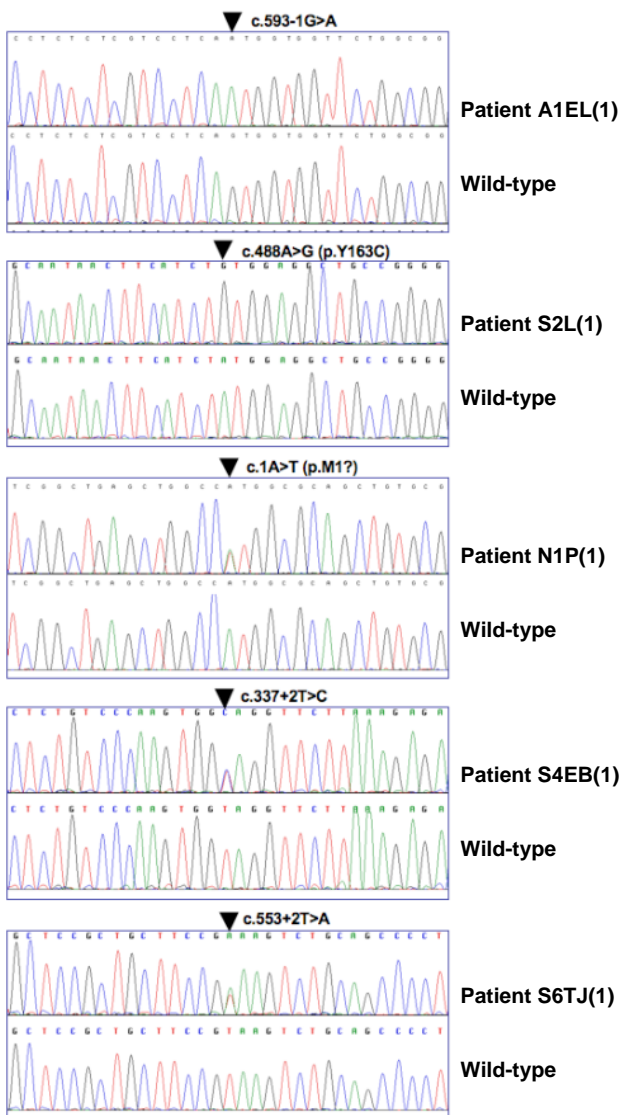

Sequence chromatograms revealing 5 distinct *SPINT2* mutations (arrow heads) identified in patients with syndromic CSD.

**Figure S2.** MLPA Analysis Does Not Reveal *SPINT2* Copy Number Changes in CSD Patients

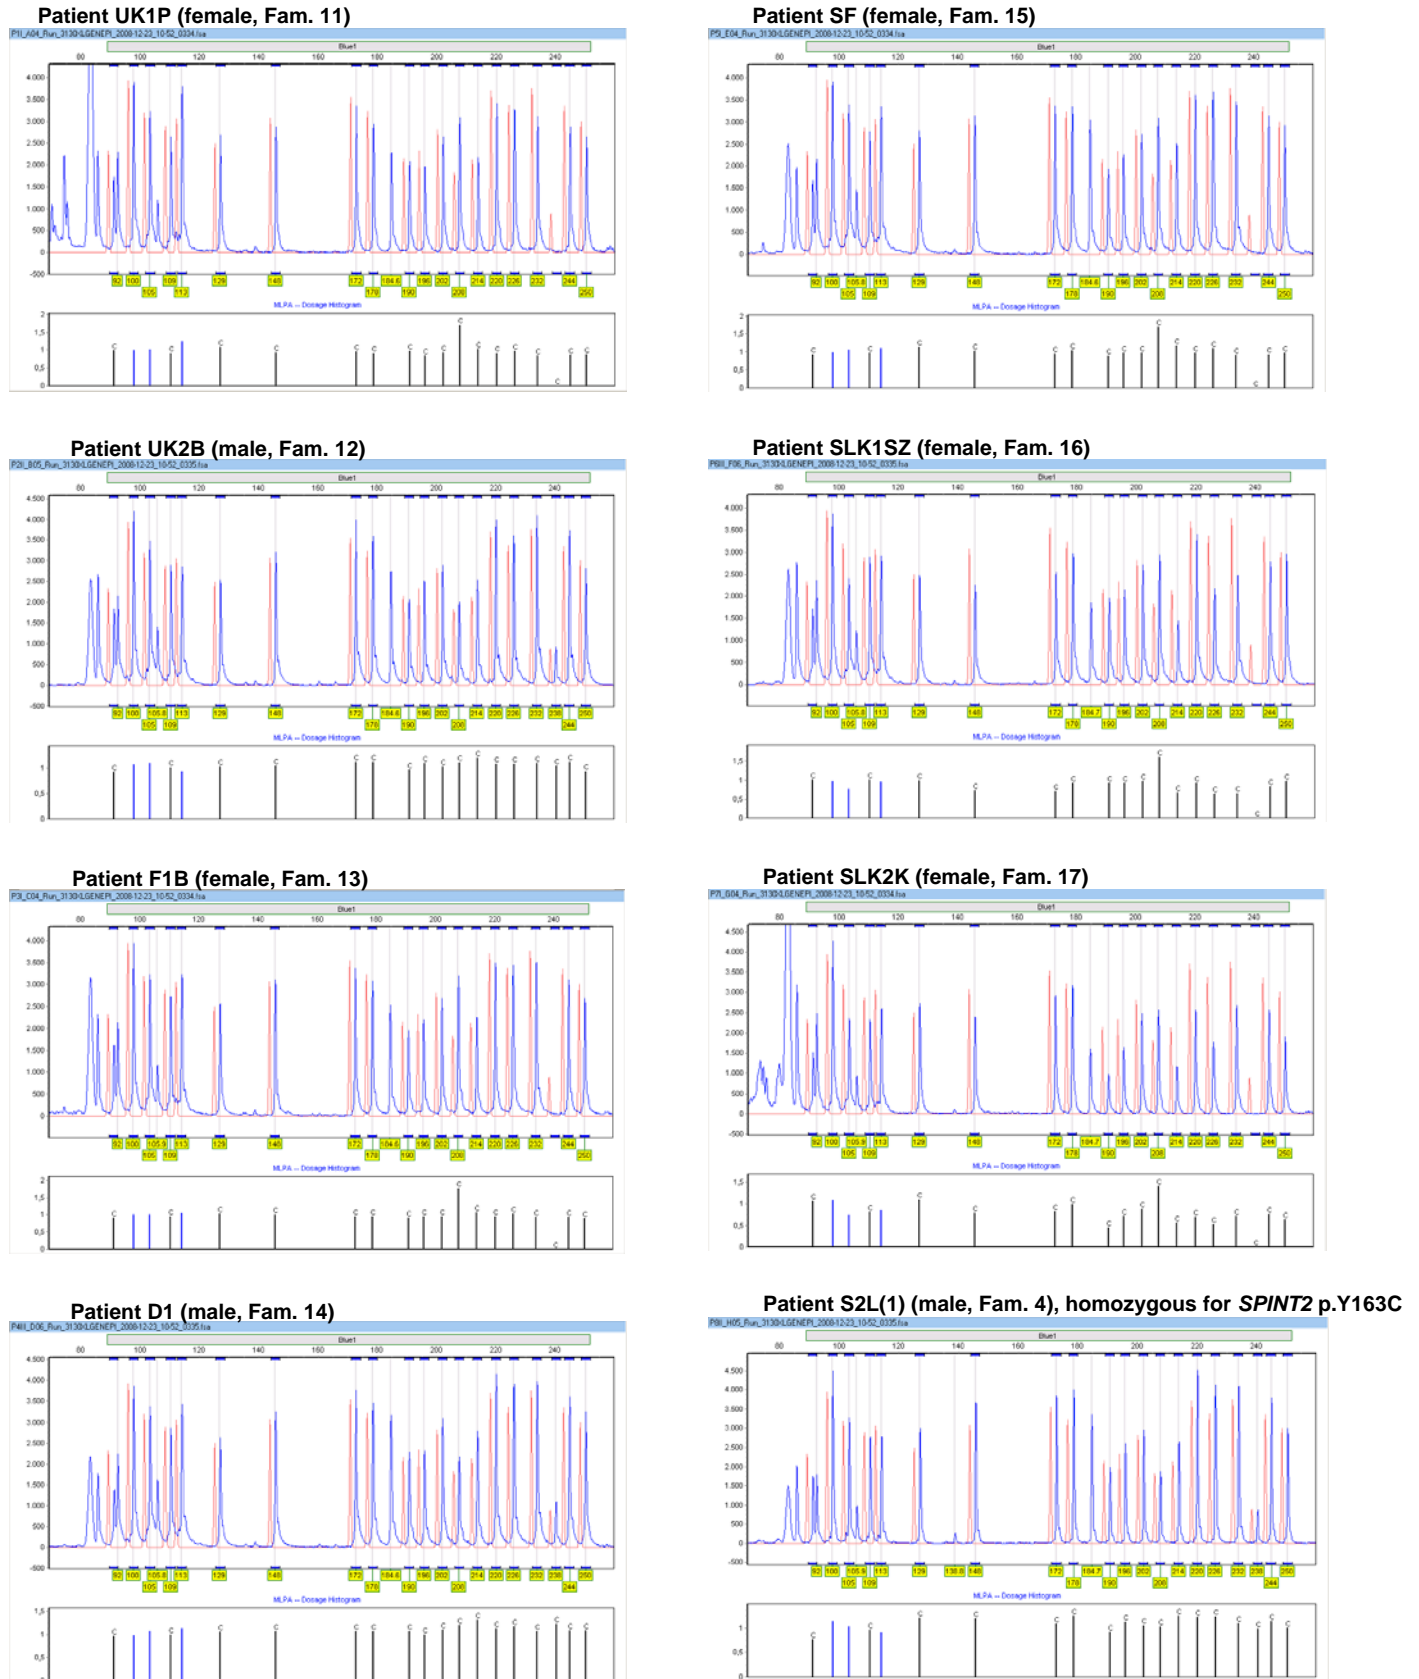

Multiplex ligation-dependent probe amplification (MLPA) analysis was conducted for each CSD patient without *SPINT2* mutations identified upon genomic sequencing and for patient S2L(1) who was identified with a homozygous p.Y163C mutation, and compared with the results of 8 control samples. Two panels are shown for each patient. Each upper panel displays the raw data of the fragment analysis including 3 probes corresponding to *SPINT2* exons 5, 2, and 7, respectively, and 17 control probes from different chromosomes contained in the MRC-Holland SALSA MLPA P-300-A1 kit. Fragment traces of patient samples are shown in blue and are each compared with the average of 8 control samples (in red). The size of the fragments is given in bases on the X-axis, and the amount of the fragments is displayed on the Y-axis. The results of the MLPA analyses are shown in the lower panels, and the relative copy numbers for each probe are scaled on the Y-axis. Blue bars correspond to *SPINT2* exons 5, 2, and 7, displayed at 100, 105 and 113 bases, respectively, and black bars correspond to control probes. Control probes displayed at 208 and 238 bases correspond to X- and Y-chromosomal loci, respectively.

**Table S1.** Primer Sequences for Amplification and Sequencing of *SPINT2* in Genomic DNA

| Name        | Sequence                | fragment length (bp) |
|-------------|-------------------------|----------------------|
| SPINT2 1f   | ACCTGATCGCGAGACCCC      | 285                  |
| SPINT2 1r   | GAACGCCATCAAGTAGCCC     |                      |
| SPINT2 2f   | GATTGCCCTGCCAAGCTAAC    | 242                  |
| SPINT2 2rnn | AACAAAAGCTCCA ACTACTGCC |                      |
| SPINT2 3f   | CTGGCAGTCTCTCGAAAGC     | 288                  |
| SPINT2 3r   | CCCATAAGGATGCTGGAGC     |                      |
| SPINT2 4f   | GCCCAGCCTCCCTAACAC      | 193                  |
| SPINT2 4rnn | AGGATGGTCTTGATATCCTGACC |                      |
| SPINT2 5f   | TCAGGCACTTTCTGGCTTGC    | 366                  |
| SPINT2 5r   | GGCTTAGAGGCCTTGCTGC     |                      |
| SPINT2 6f   | CCATGGAGGCCCTGGCTG      | 265                  |
| SPINT2 6rnn | TCACGCAGAAACATGACTTTCTG |                      |
| SPINT2 7f   | ACTCTGGCTGCAACTCCCC     | 310                  |
| SPINT2 7r   | ACTCAAATCCGAGTCAATCCC   |                      |
| SPINT2 7R3  | CACCATCACGAACAGCCCC     | 89                   |

**Table S2.** Primer Sequences to Amplify *SPINT2* cDNA in Two Overlapping Fragments

|            |                       |
|------------|-----------------------|
| SPINT2 1f  | ACCTGATCGCGAGACCCC    |
| SPINT2 c5r | gtgactgcggtggcgggtgc  |
| SPINT2 c4f | tcctctgtcccaagtgtcc   |
| SPINT2 7r  | ACTCAAATCCGAGTCAATCCC |

**Table S3.** Oligos for *SPINT2* cDNA Cloning

|         |                           |
|---------|---------------------------|
| TopoF   | CACCATGGCGCAGCTGTGCGGGC   |
| V5R     | CAGGACATATGTGTTCTTCACCAGC |
| TopoM1F | CACCTTGGCGCAGCTGTGCGGGC   |

**Table S4.** Synthetic MLPA Probes to Target Six out of the Seven *SPINT2* Exons

| Exon |            |                                                                        | Complete probe length (bases) |
|------|------------|------------------------------------------------------------------------|-------------------------------|
| #    | Name       | 5' modification and 5'-3' sequence including primer annealing sequence |                               |
| 1    | SPINT2 1_5 | FAM-ggggtccctaaggggttgaGGCTGAGGCGGAGCCGGGCGTTTCTCG                     | 96                            |
|      | SPINT2 1_3 | Pho-CCCTGCTGGGATCGCTGCTCCTCTCTGtctagattggatcttgctggcac                 |                               |
| 2    | SPINT2 2_5 | FAM-ggggtccctaaggggttgaCAATGTCACTGACGGATCCTGCCA                        | 105                           |
|      | SPINT2 2_3 | Pho-GCTGTTTGTGTATGGGGGCTGTGACGGAAACAGCAATAAtctagattggatcttgctggcac     |                               |
| 5    | SPINT2 5_5 | FAM-ggggtccctaaggggttgaACGCTGGTACTTTGACGTGGAGAGGAACT                   | 100                           |
|      | SPINT2 5_3 | Pho-CCTGCAATAACTTCATCTATGGAGGCTGtctagattggatcttgctggcac                |                               |
| 7    | SPINT2 7_5 | FAM-ggggtccctaaggggttgaAGGAACCAGGAGCGTGCCCTGCGCACCGTCTGGAG             | 113                           |
|      | SPINT2 7_3 | Pho-CTCCGAGATGACAAGGAGCAGCTGGTGAAGAACACtctagattggatcttgctggcac         |                               |
| 4    | SPINT2 4_5 | FAM-ggggtccctaaggggttgaCAGCTCCCAGAAGGCAGGATTCTGAAGACCACTCCAGC          | 117                           |
|      | SPINT2 4_3 | Pho-GATATGTTCAACTATGAAGGTAAAACCTCAAAGAGGCtctagattggatcttgctggcac       |                               |
| 3    | SPINT2 3_5 | FAM-ggggtccctaaggggttgaCTCTTTCCTGTGCTGTTTCTTTGTCCCCTTGCAGAGAATGCCACGGG | 122                           |
|      | SPINT2 3_3 | Pho-ACGGGTGACCTGGCCACCAGCAGGAATGCAGCtctagattggatcttgctggcac            |                               |

Synthetic probes were designed according to MRC-Holland (Amsterdam, The Netherlands), [http://www.mrc-holland.com/pages/support\\_desing\\_synthetic\\_probepag.html](http://www.mrc-holland.com/pages/support_desing_synthetic_probepag.html). MLPA analysis was performed using standard conditions.
